# Supplementary material
Source: HighWire-hosted journal article supplement (https://bmjopen.bmj.com/content/10/5/e034066)
Supplement: inline-supplementary-material-1 [file inline-supplementary-material-1.pdf]

**Childhood Pneumonia Surveillance**  
Department of Paediatrics, KGMU, Lucknow ,UP

**Form-R**  
(RADIOLOGY REPORT FORM)

|    |                                        |                                                                                                                                                                                                                                                                                      |
|----|----------------------------------------|--------------------------------------------------------------------------------------------------------------------------------------------------------------------------------------------------------------------------------------------------------------------------------------|
| 1  | <b>Drs_ID</b>                          | [ ][ ][ ][ ]                                                                                                                                                                                                                                                                         |
|    | <b>Radiology Report</b>                | <b>Patient Details</b>                                                                                                                                                                                                                                                               |
| 2  | <b>IDNo:</b>                           | [ ] / [ ] / [ ][ ][ ] / [ ][ ][ ][ ]<br>State /District / Unit / Subject number<br>(For office use)                                                                                                                                                                                  |
| 2  | <b>Date Of Report</b>                  | [ ][ ] / [ ][ ] / [ ][ ][ ][ ] (DD/MM/YYYY)                                                                                                                                                                                                                                          |
|    | <b>Report Details</b>                  | <b>Findings ( tick one)</b>                                                                                                                                                                                                                                                          |
| 3  | <b>Image Quality</b>                   | Adequate <input type="checkbox"/> Suboptimal <input type="checkbox"/> Un-interpretable <input type="checkbox"/>                                                                                                                                                                      |
| 4  | <b>Significant Pathology</b>           | Yes <input type="checkbox"/> No <input type="checkbox"/> Un-interpretable <input type="checkbox"/>                                                                                                                                                                                   |
| 5  | <b>End Point Consolidation</b>         |                                                                                                                                                                                                                                                                                      |
| 5a | Left                                   | Yes <input type="checkbox"/> No <input type="checkbox"/> Un-interpretable <input type="checkbox"/>                                                                                                                                                                                   |
| 5b | Right                                  | Yes <input type="checkbox"/> No <input type="checkbox"/> Un-interpretable <input type="checkbox"/>                                                                                                                                                                                   |
|    |                                        | Uninterpretable                                                                                                                                                                                                                                                                      |
| 6  | <b>Other Infiltrates/Abnormalities</b> |                                                                                                                                                                                                                                                                                      |
| 6a | Left                                   | Yes <input type="checkbox"/> No <input type="checkbox"/> Un-interpretable <input type="checkbox"/>                                                                                                                                                                                   |
| 6b | Right                                  | Yes <input type="checkbox"/> No <input type="checkbox"/> Un-interpretable <input type="checkbox"/>                                                                                                                                                                                   |
| 7  | <b>Pleural Fluid</b>                   |                                                                                                                                                                                                                                                                                      |
| 7a | Left                                   | Yes <input type="checkbox"/> No <input type="checkbox"/> Un-interpretable <input type="checkbox"/>                                                                                                                                                                                   |
| 7b | Right                                  | Yes <input type="checkbox"/> No <input type="checkbox"/> Un-interpretable <input type="checkbox"/>                                                                                                                                                                                   |
| 8  | <b>Comments:</b>                       | <input type="text"/>                                                                                                                                                                                                                                                                 |
| 9  | <b>Conclusion:</b>                     | a) Primary endpoint pneumonia only <input type="checkbox"/><br>b) Other infiltrate only <input type="checkbox"/><br>c) Both PEP and other infiltrate <input type="checkbox"/><br>d) Normal <input type="checkbox"/><br>e) Un-interpretable for any findings <input type="checkbox"/> |
